# Supplementary material for: NAC Transcription Factor GmNAC12 Improved Drought Stress Tolerance in Soybean
Source: MDPI journal article supplement (doi:10.3390/ijms231912029), 2022-10-10
Supplement: s1 [file Supplementary Figure.pdf › Supplementary Figure.pdf]

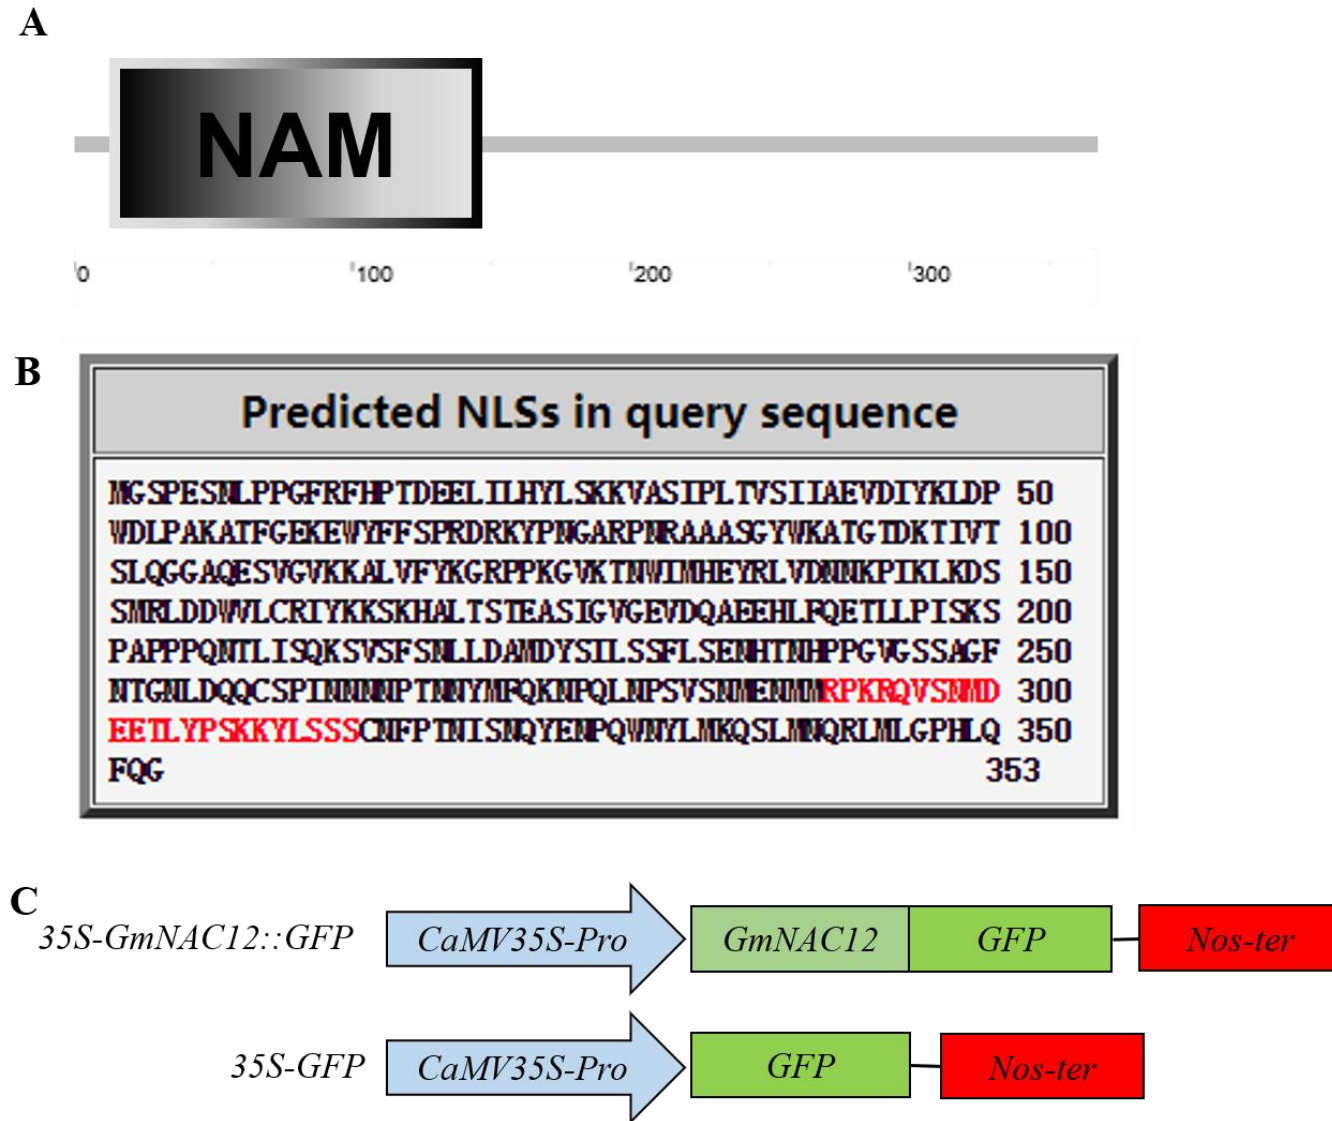

**Figure S1.** GmNAC12 contains a NAM domain and two NLSs. (A) Amino acid sequence analysis of GmNAC12. (B) Prediction the nuclear localization signals of GmNAC12 by cNLS Mapper. (C) Construction of GmNAC12 subcellular localization vector.
