# Supplementary material for: NAC Transcription Factor GmNAC12 Improved Drought Stress Tolerance in Soybean
Source: MDPI journal article supplement (doi:10.3390/ijms231912029), 2022-10-10
Supplement: s1 [file Supplementary Table.pdf › Supplementary Table.pdf]

**Table S1****Primers used to isolate the *GmNAC12***

| Gene           | Sequence of primer pair (5'-3')                  |
|----------------|--------------------------------------------------|
| <i>GmNAC12</i> | TTTCCTTTCAACCTTATCAAATTAA/GGTGTGCTCAGCTTCTGAATAT |

**Primers used for quantitative real-time PCR**

| Gene             | Sequence of primer pairs (5'-3')          |
|------------------|-------------------------------------------|
| <i>GmNAC12</i>   | TCCAAGAGACCCTTTTGCCA/TGGTGGGTGGTTGGTATGAT |
| <i>GmActin11</i> | GGTGGTTCTATCTTGGCATC/CTTTCGCTTCAATAACCCTA |

**Primers used to construct vector for subcellular localization**

| Gene           | Sequence of primer pairs (5'-3')                                                         |
|----------------|------------------------------------------------------------------------------------------|
| <i>GmNAC12</i> | CGGGGTACCATGGGAAGCCCAGAATCCAATTTG/<br>TTCCGCGGCCGCTATGGCCGACGTCGACTCCTTGAAATTGAAGATGAGGA |

**Primers used to construct vector for Crispr/Cas9 target and test**

| Gene                   | Sequence of primer pairs (5'-3')              |
|------------------------|-----------------------------------------------|
| <i>GmNAC12-KO-20bp</i> | ATCAAGCTCAAAGACTCCTC                          |
| <i>GmNAC12-KO-test</i> | GTCCTAGAGACCGAAAGTACCC/CCACATGTTGATTGCATATGGC |

**Primers used to construct vector for plant overexpression**

| Gene              | Sequence of primer pairs (5'-3')                                       |
|-------------------|------------------------------------------------------------------------|
| <i>GmNAC12-OE</i> | GCTCTAGAATGGGAAGCCCAGAATCCAATTTG/<br>GGACTAGTTTATCCTTGAAATTGAAGATGAGGA |

**Primers used to construct vector for yeast two-hybrid**

| Gene           | Sequence of primer pairs (5'-3')                                                 |
|----------------|----------------------------------------------------------------------------------|
| <i>GmNAC12</i> | CATGGAGGCCGAATTCATGGGAAGCCCAGAATCCA/<br>GGATCCCCGGAATTCTCCTTGAAATTGAAGATGAGGACCA |

Table S2. GO annotations of GmNAC12 candidate interaction proteins

| ID         | term                                      | category           | gene                                                                                                                                                                                                                        |
|------------|-------------------------------------------|--------------------|-----------------------------------------------------------------------------------------------------------------------------------------------------------------------------------------------------------------------------|
| GO:0006412 | translation                               | biological process | Glyma.02G047800; Glyma.14G030000; Glyma.03G197600; Glyma.10G221600; Glyma.17G098600; Glyma.06G192500; Glyma.03G241100; Glyma.04G139200; Glyma.02G220000; Glyma.01G140100; Glyma.07G198600                                   |
| GO:0006635 | fatty acid beta-oxidation                 | biological process | Glyma.07G239200; Glyma.15G027800; Glyma.11G035200                                                                                                                                                                           |
| GO:0042742 | defense response to bacterium             | biological process | Glyma.15G126400; Glyma.19G245500; Glyma.07G015800; Glyma.19G245600; Glyma.02G062500; Glyma.17G057100; Glyma.19G245400                                                                                                       |
| GO:0051607 | defense response to virus                 | biological process | Glyma.05G105800; Glyma.03G201100; Glyma.19G198900                                                                                                                                                                           |
| GO:0018298 | protein-chromophore linkage               | biological process | Glyma.14G008000; Glyma.05G128000; Glyma.08G082900                                                                                                                                                                           |
| GO:0042744 | hydrogen peroxide catabolic process       | biological process | Glyma.12G073100; Glyma.05G103600; Glyma.14G201700; Glyma.20G001400                                                                                                                                                          |
| GO:0009834 | plant-type secondary cell wall biogenesis | biological process | Glyma.19G180700; Glyma.12G069300; Glyma.05G161900                                                                                                                                                                           |
| GO:0050832 | defense response to fungus                | biological process | Glyma.15G126400; Glyma.19G245500; Glyma.19G245600; Glyma.12G240400; Glyma.19G245400                                                                                                                                         |
| GO:0007264 | small GTPase mediated signal transduction | biological process | Glyma.05G105800; Glyma.05G176300; Glyma.13G333500                                                                                                                                                                           |
| GO:0009408 | response to heat                          | biological process | Glyma.16G101900; Glyma.07G140400; Glyma.11G078100; Glyma.02G062500                                                                                                                                                          |
| GO:0022627 | cytosolic small ribosomal subunit         | cellular component | Glyma.02G047800; Glyma.10G221600; Glyma.17G098600; Glyma.06G192500; Glyma.11G021700                                                                                                                                         |
| GO:0005840 | ribosome                                  | cellular component | Glyma.14G030000; Glyma.03G197600; Glyma.10G221600; Glyma.03G241100; Glyma.04G139200; Glyma.02G220000; Glyma.07G198600; Glyma.02G002800                                                                                      |
| GO:0009522 | photosystem I                             | cellular component | Glyma.14G008000; Glyma.05G128000; Glyma.08G082900                                                                                                                                                                           |
| GO:0022626 | cytosolic ribosome                        | cellular component | Glyma.02G047800; Glyma.10G221600; Glyma.01G140100; Glyma.11G021700; Glyma.13G245300                                                                                                                                         |
| GO:0009523 | photosystem II                            | cellular component | Glyma.14G008000; Glyma.05G128000; Glyma.08G082900                                                                                                                                                                           |
| GO:0009535 | chloroplast thylakoid membrane            | cellular component | Glyma.02G007700; Glyma.14G008000; Glyma.20G110400; Glyma.09G250800; Glyma.05G128000; Glyma.08G082900; Glyma.17G130100; Glyma.05G048000; Glyma.19G007800                                                                     |
| GO:0009506 | plasmodesma                               | cellular component | Glyma.05G105800; Glyma.03G201100; Glyma.13G043900; Glyma.10G221600; Glyma.08G071300; Glyma.17G098600; Glyma.06G192500; Glyma.01G140100; Glyma.11G035200; Glyma.19G198900; Glyma.05G070300                                   |
| GO:0016607 | nuclear speck                             | cellular component | Glyma.03G188600; Glyma.18G195500; Glyma.19G191100                                                                                                                                                                           |
| GO:0016020 | membrane                                  | cellular component | Glyma.13G285300; Glyma.10G221600; Glyma.11G078100; Glyma.18G225300; Glyma.07G015800; Glyma.17G098600; Glyma.06G192500; Glyma.01G140100; Glyma.14G048800; Glyma.05G070300; Glyma.11G021700; Glyma.07G039800                  |
| GO:0005622 | intracellular                             | cellular component | Glyma.17G186600; Glyma.19G245600; Glyma.02G062500; Glyma.05G176300                                                                                                                                                          |
| GO:0003735 | structural constituent of ribosome        | molecular function | Glyma.02G047800; Glyma.14G030000; Glyma.03G197600; Glyma.10G221600; Glyma.17G098600; Glyma.06G192500; Glyma.03G241100; Glyma.04G139200; Glyma.02G220000; Glyma.01G140100; Glyma.07G198600; Glyma.11G021700; Glyma.13G245300 |

|            |                                        |                    |                                                                                                      |
|------------|----------------------------------------|--------------------|------------------------------------------------------------------------------------------------------|
| GO:0008061 | chitin binding                         | molecular function | Glyma.19G245500; Glyma.11G124500; Glyma.19G245400                                                    |
| GO:0016168 | chlorophyll binding                    | molecular function | Glyma.14G008000; Glyma.05G128000; Glyma.08G082900                                                    |
| GO:0019843 | rRNA binding                           | molecular function | Glyma.02G047800; Glyma.10G221600; Glyma.17G098600; Glyma.06G192500; Glyma.13G151300                  |
| GO:0004842 | ubiquitin-protein transferase activity | molecular function | Glyma.15G126400; Glyma.18G195500; Glyma.08G153200                                                    |
| GO:0003729 | mRNA binding                           | molecular function | Glyma.02G047800; Glyma.17G240400; Glyma.10G221600; Glyma.01G140100; Glyma.11G021700                  |
| GO:0050660 | flavin adenine dinucleotide binding    | molecular function | Glyma.13G199600; Glyma.11G035200; Glyma.05G124900                                                    |
| GO:0004601 | peroxidase activity                    | molecular function | Glyma.05G103600; Glyma.14G201700; Glyma.20G001400                                                    |
| GO:0042802 | identical protein binding              | molecular function | Glyma.03G015500; Glyma.13G199600; Glyma.07G257500                                                    |
| GO:0020037 | heme binding                           | molecular function | Glyma.13G285300; Glyma.12G073100; Glyma.05G103600; Glyma.14G201700; Glyma.07G039800; Glyma.20G001400 |

Table S3. KEGG pathway of GmNAC12 candidate interaction proteins

| ID      | term                              | gene                                                                                                                                                                                                                        |
|---------|-----------------------------------|-----------------------------------------------------------------------------------------------------------------------------------------------------------------------------------------------------------------------------|
| ko03010 | ribosome                          | Glyma.03G197600; Glyma.01G140100; Glyma.13G245300; Glyma.03G241100; Glyma.04G139200; Glyma.17G098600; Glyma.02G220000; Glyma.07G198600; Glyma.06G192500; Glyma.11G021700; Glyma.02G047800; Glyma.02G002800; Glyma.10G221600 |
| ko00196 | photosynthesis - antenna proteins | Glyma.05G128000; Glyma.08G082900; Glyma.14G008000                                                                                                                                                                           |
| ko00983 | drug metabolism - other enzymes   | Glyma.05G222300; Glyma.10G125100; Glyma.07G140400; Glyma.03G109500                                                                                                                                                          |
| ko04371 | apelin signaling pathway          | Glyma.14G040600; Glyma.07G198600; Glyma.13G060400                                                                                                                                                                           |
| ko00195 | photosynthesis                    | Glyma.09G250800; Glyma.17G130100; Glyma.05G048000                                                                                                                                                                           |
| ko04144 | endocytosis                       | Glyma.13G333500; Glyma.14G018200; Glyma.11G099100; Glyma.16G101900; Glyma.14G048800; Glyma.05G176300                                                                                                                        |
| ko00940 | phenylpropanoid biosynthesis      | Glyma.05G124900; Glyma.20G001400; Glyma.15G003600; Glyma.05G103600; Glyma.14G201700; Glyma.08G220200                                                                                                                        |
| ko00480 | glutathione metabolism            | Glyma.19G226700; Glyma.07G140400; Glyma.12G073100                                                                                                                                                                           |
| ko03018 | RNA degradation                   | Glyma.07G184300; Glyma.17G240400; Glyma.16G042600                                                                                                                                                                           |
| ko00240 | pyrimidine metabolism             | Glyma.05G222300; Glyma.16G043700; Glyma.03G109500                                                                                                                                                                           |
| ko00190 | oxidative phosphorylation         | Glyma.17G130100; Glyma.18G244300; Glyma.05G048000                                                                                                                                                                           |
| ko00500 | starch and sucrose metabolism     | Glyma.13G114000; Glyma.13G088300; Glyma.07G172000                                                                                                                                                                           |
| ko03013 | RNA transport                     | Glyma.17G186600; Glyma.17G240400; Glyma.19G252400                                                                                                                                                                           |
| ko04016 | MAPK signaling pathway - plant    | Glyma.14G040600; Glyma.12G073000; Glyma.03G109500                                                                                                                                                                           |
| ko00230 | purine metabolism                 | Glyma.16G043700; Glyma.10G125100; Glyma.03G109500                                                                                                                                                                           |
